# Supplementary material
Source: Springer Nature journal article supplement (https://www.springermedizin.de/resource/supplementary/12967_2011_855_MOESM6_ESM.pdf/9577198)

## Gated on CD8<sup>+</sup> T cells

**A**

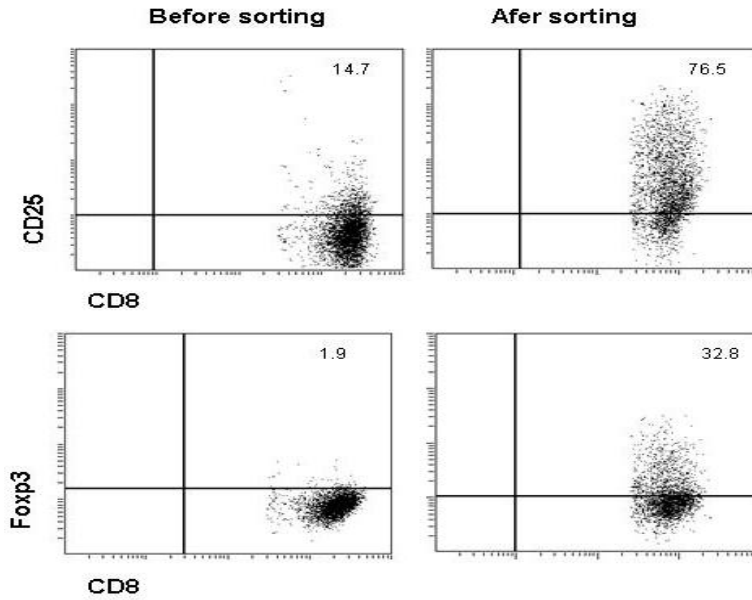

**B**

## Gated on CSFE positive cells

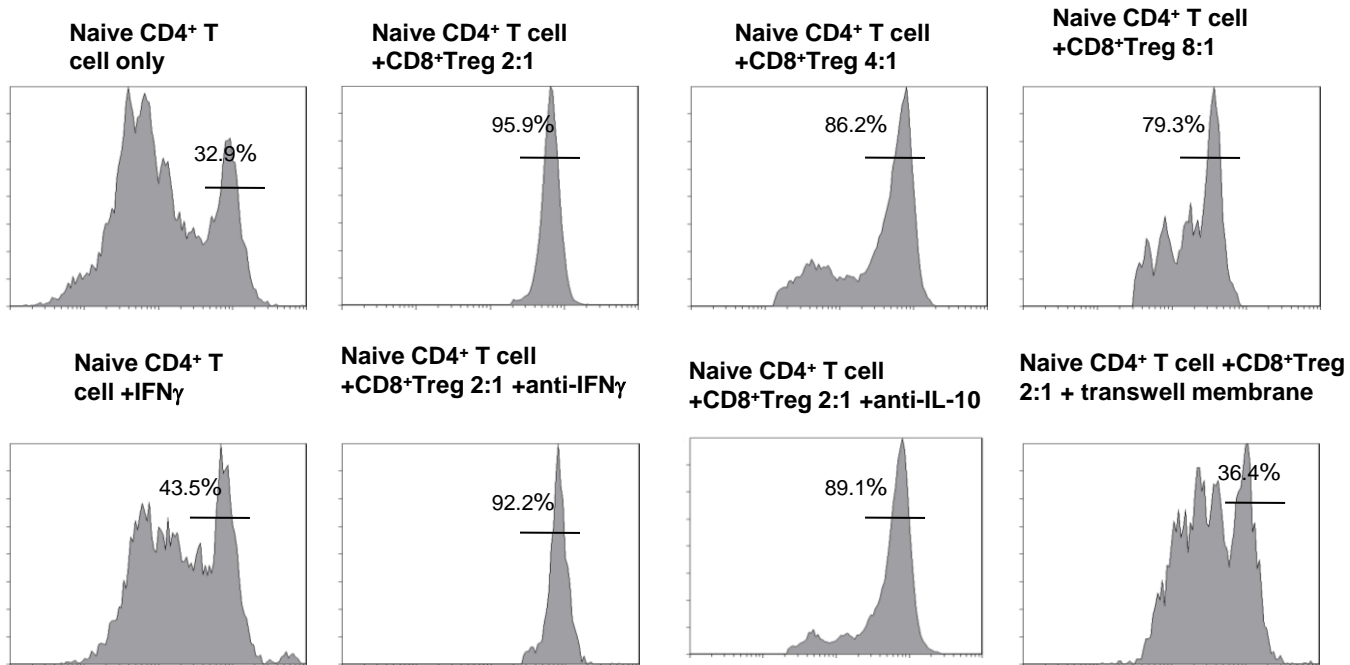

Supplement: MOESM6 [file 9577198]
